# Supplementary material
Source: HighWire-hosted journal article supplement (http://sti.bmjjournals.com/highwire/filestream/156170/field_highwire_adjunct_files/2/83suppl1i50webonlyfig2.pdf)
Supplement: 83suppl1i50webonlyfig2.pdf [file 83suppl1i50webonlyfig2.pdf]

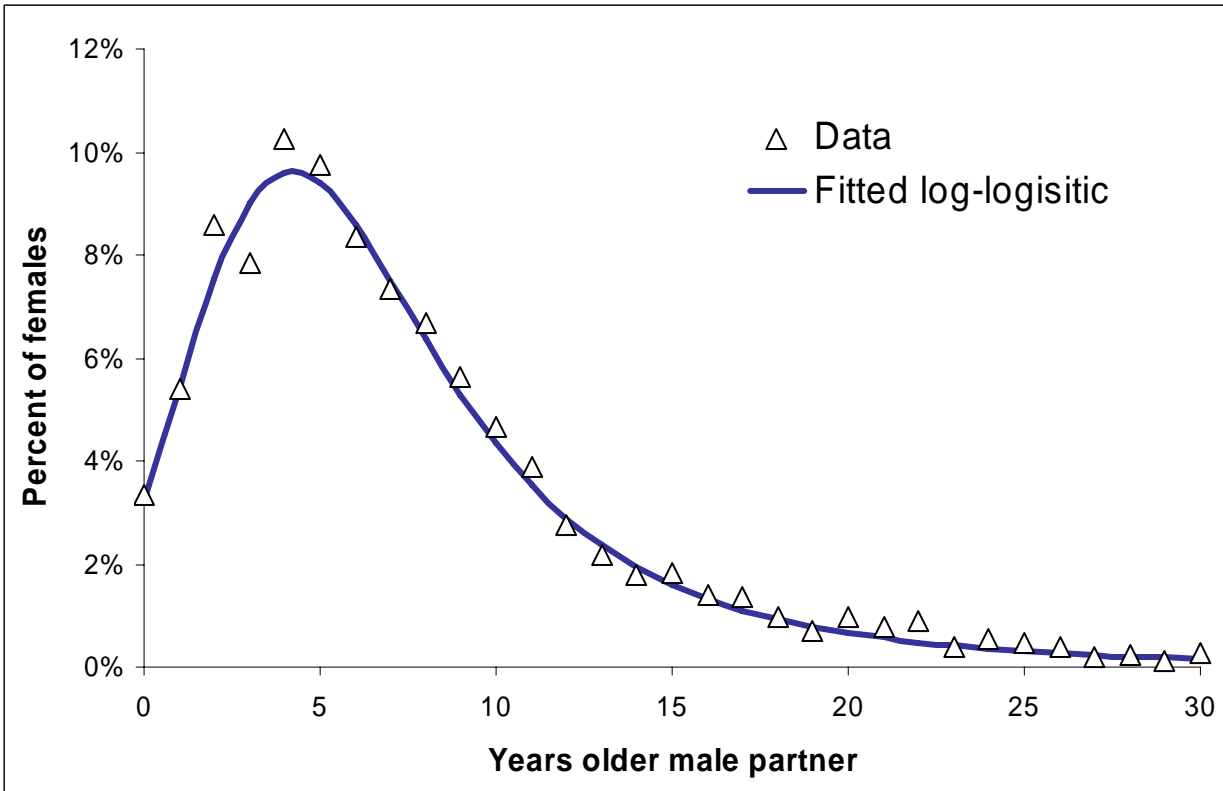

Figure S2: Age-difference (male age minus female age) for all sexual partnerships reported by females (triangles) with fitted log-logistic distribution for all non-negative age-differences (line).
